# Supplementary material for: Two Distinct Conformations in Bet v 2 Determine Its Proteolytic Resistance to Cathepsin S
Source: Int J Mol Sci. 2017 Oct 16;18(10):2156. doi: 10.3390/ijms18102156 (PMC5666837; doi:10.3390/ijms18102156)
Supplement: Supplementary file 1 [file ijms-18-02156-s001.pdf]

[illegible]

Tryptic digest: Bet v 2 oxidized form

MSWQTYVDEH LMCDDIDGQGQQLAASAIVGH DGSVWAQSSS FPQFKPQEIT GIMKDFEEPG HLAPTGLHLG GIKYMWIQG

AGAVIRGKKG SGGITIKKTG QALVFGIYEE PVTPGQCNMV VERLGDYLLD QGL

Tryptic digest: Bet v 2 reduced form

MSWQTYVDEH LMCDDIDGQGQQLAASAIVGH DGSVWAQSSS FPQFKPQEIT GIMKDFEEPG HLAPTGLHLG GIKYMWIQG

AGAVIRGKKG SGGITIKKTG QALVFGIYEE PVTPGQCNMV VERLGDYLLD QGL

1

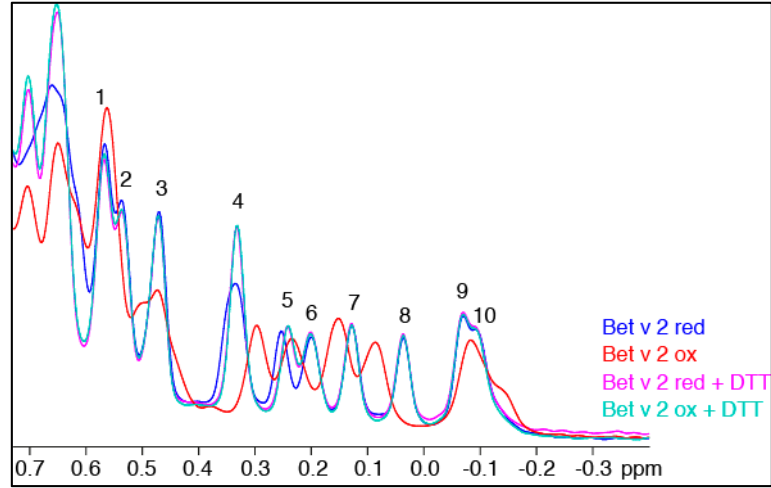

**Figure S2.** One-dimensional  $^1\text{H}$  spectra of 0.2 mM Bet v 2 preparations in Tris buffer measured at 298 K and 600 MHz using 32 transients.

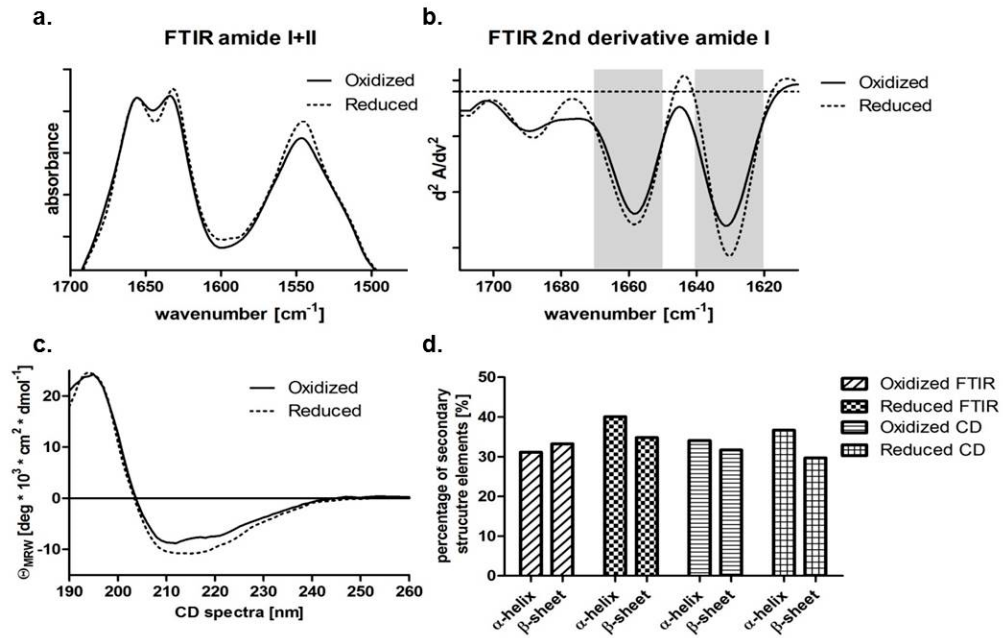

**Figure S3.** Secondary structure content of Bet v 2 oxidized and reduced forms. (a) FTIR amide I and II spectra. (b) FTIR second derivative of amide I spectra. (c) Circular Dichroism spectra. d. Summary of calculated alpha helices and beta sheets content for FTIR and CD.

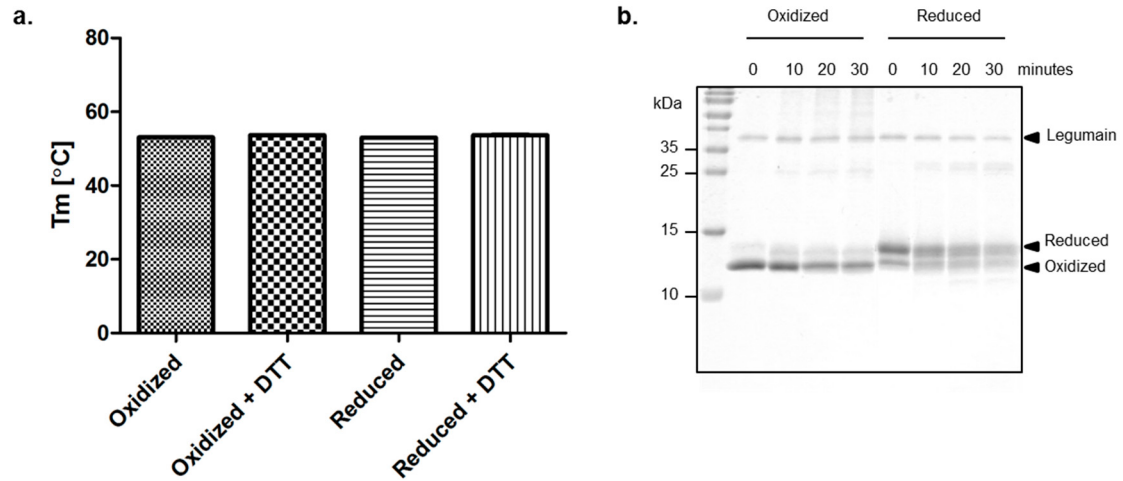

**Figure S4.** Stabilities of Bet v 2. (a) Thermal stability of Bet v 2 determined by thermal shift assay. The assay was performed in triplicates and the error bar was too small to be seen (b) Proteolytic susceptibility of Bet v 2 towards Legumain. Chronological digestion assay was performed at pH 5.5, 37°C up to 30 minutes with legumain to Bet v 2 molar ratio of 1:20. Digestion profiles were visualized on SDS-PAGE under non-reducing condition and Coomassie Blue staining.

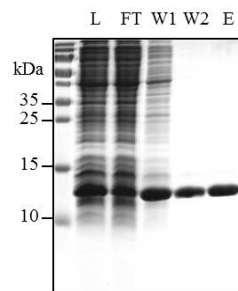

**Figure S5.** Purification of recombinant Bet v 2. Proteins were visualized on a reducing SDS-PAGE and stained with Coomassie Blue. L, cell lysate; FT, flow through; W1, wash (2 column volume); W2, wash (5 column volume); E, elution.
